# Supplementary material for: Imaging lipid order changes in endosome membranes of live cells by using a Nile Red-based membrane probe
Source: Royal Society of Chemistry journal article supplement (doi:10.1039/c3ra47181k), 2014-01-01
Supplement: c3ra47181k.pdf [file c3ra47181k.pdf]

Electronic Supplementary Information

## Imaging lipid order changes in endosome membranes of live cells by using a Nile Red-based membrane probe

Zeinab Darwich, Andrey S. Klymchenko, Denis Dujardin and Yves Mély

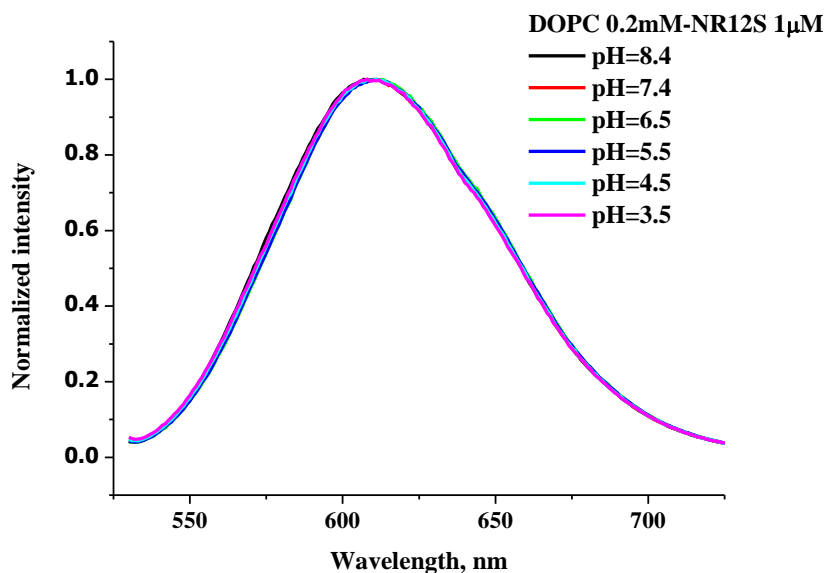

**Figure S1.** pH dependence of NR12S emission spectra in DOPC vesicles. DOPC (0.2 mM) vesicles were stained with 1 µM of NR12S and emission spectra were recorded at different pH values. The spectra of NR12S are not sensitive to pH in the range 3.5-8.4.

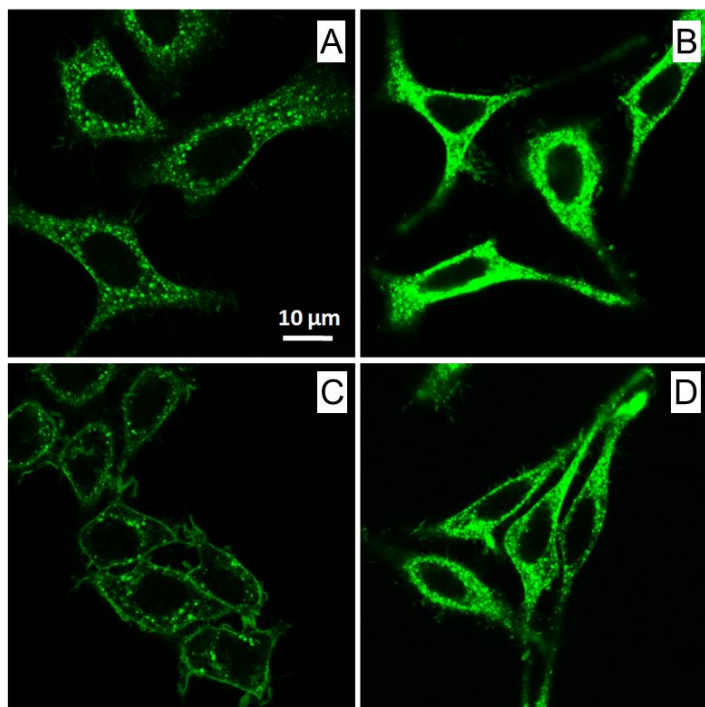

**Figure S2.** Internalization of Alexa 488-labeled transferrin after 5 (A and C) and 30 min (B and D) in the absence (A and B) or presence of NR12S (C and D).
